# Supplementary material
Source: publisher site journal article supplement (https://www.dovepress.com/article/426565)
Supplement: Supplementary file 1 [file get_supplementary_file.php]

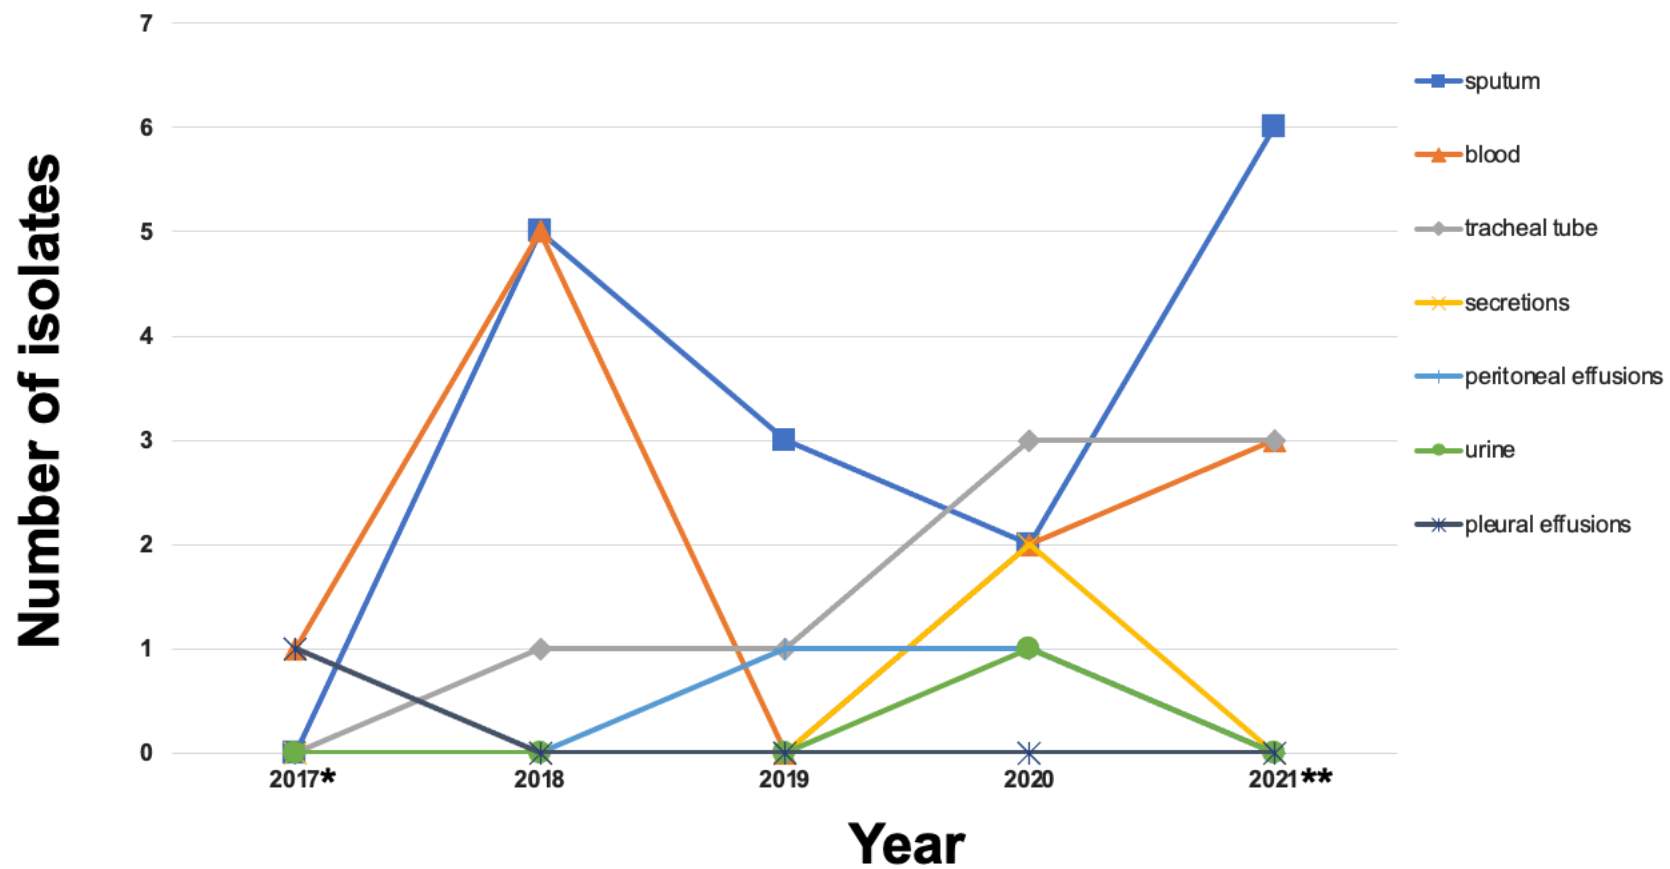

**Figure S1** Specimen distribution of the 41 CRKP isolates from June 2017 and June 2021.

**Notes:** \*The isolates collected June 2017 to December 2017. \*\*The isolates collected January 2021 to June 2021.



Supplementary Table S2 Plasmid replicons, sequence types, and resistance genes of the 41 CRKP isolates.

| strian | specimen             | ST        | wzi      | K_type   | IncFIB   | IncFII   | IncX3     | IncR       | IncC       | IncN      | IncHI1B    | repA(pKOX) |
|--------|----------------------|-----------|----------|----------|----------|----------|-----------|------------|------------|-----------|------------|------------|
| 046001 | blood                | 17        | wzi360   | unknown  |          |          |           | IncR       | IncC       |           |            |            |
| 046002 | pleural effusions    | 2407      | wzi25    | K25      | IncFIB   |          | IncX3     |            |            |           |            |            |
| 046003 | blood                | 17        | wzi360   | unknown  |          |          |           | IncR       | IncC       |           |            |            |
| 046004 | sputum               | 2407      | wzi25    | K25      | IncFIB   |          | IncX3     |            |            |           | IncHI1B    |            |
| 046005 | blood                | 70        | wzi123   | unknown  | IncFIB   | IncFII   |           | IncR       |            | IncN      |            |            |
| 046007 | sputum               | 307       | wzi173   | unknown  | IncFIB   |          |           |            |            |           | IncHI1B    | repA(pKOX) |
| 046008 | sputum               | 789       | wzi18    | K18      | IncFIB   | IncFII   | IncX3     |            |            |           |            |            |
| 046009 | sputum               | 789       | wzi18    | K18      | IncFIB   | IncFII   | IncX3     |            |            |           |            |            |
| 046010 | blood                | 789       | wzi18    | K18      | IncFIB   | IncFII   | IncX3     |            |            |           |            |            |
| 046011 | blood                | 789       | wzi18    | K18      | IncFIB   | IncFII   | IncX3     |            |            |           |            |            |
| 046012 | sputum               | 789       | wzi18    | K18      | IncFIB   | IncFII   | IncX3     |            |            |           |            |            |
| 046015 | blood                | 789       | wzi18    | K18      | IncFIB   | IncFII   | IncX3     |            |            |           |            |            |
| 046016 | tracheal tube        | 789       | wzi18    | K18      | IncFIB   | IncFII   | IncX3     |            |            |           |            |            |
| 046017 | peritoneal effusions | 789       | wzi18    | K18      | IncFIB   | IncFII   | IncX3     |            |            |           |            |            |
| 046018 | tracheal tube        | 789       | wzi18    | K18      | IncFIB   | IncFII   | IncX3     |            |            |           |            |            |
| 046019 | sputum               | 278       | wzi123   | unknown  | IncFIB   | IncFII   | IncX3     |            |            |           |            |            |
| 046020 | sputum               | 2407      | wzi25    | K25      | IncFIB   |          | IncX3     |            |            |           |            |            |
| 046021 | sputum               | 789       | wzi18    | K18      | IncFIB   | IncFII   | IncX3     |            |            |           |            |            |
| 046022 | blood                | 2407      | wzi25    | K25      | IncFIB   |          | IncX3     |            |            |           |            |            |
| 046023 | blood                | 2407      | wzi25    | K25      | IncFIB   |          | IncX3     |            |            |           |            |            |
| 046024 | urine                | 789       | wzi18    | K18      | IncFIB   | IncFII   | IncX3     |            |            |           |            |            |
| 046025 | peritoneal effusions | 789       | wzi18    | K18      | IncFIB   | IncFII   | IncX3     |            |            |           |            |            |
| 046026 | tracheal tube        | 789       | wzi18    | K18      | IncFIB   | IncFII   | IncX3     |            |            |           |            |            |
| 046027 | tracheal tube        | 789       | wzi18    | K18      | IncFIB   | IncFII   | IncX3     |            |            |           |            |            |
| 046028 | sputum               | 29        | wzi85    | K30      | IncFIB   | IncFII   |           |            |            |           |            |            |
| 046029 | sputum               | 789       | wzi18    | K18      | IncFIB   | IncFII   | IncX3     |            |            |           |            |            |
| 046030 | secretions           | 35        | wzi37    | K22      |          |          | IncX3     |            |            |           |            |            |
| 046031 | tracheal tube        | 789       | wzi18    | K18      | IncFIB   | IncFII   | IncX3     |            |            |           |            |            |
| 046032 | secretions           | 789       | wzi18    | K18      |          | IncFII   | IncX3     |            |            |           |            |            |
| 046034 | sputum               | 789       | wzi18    | K18      | IncFIB   | IncFII   | IncX3     |            |            |           |            |            |
| 046035 | blood                | 789       | wzi18    | K18      | IncFIB   | IncFII   | IncX3     |            |            |           |            |            |
| 046036 | sputum               | 789       | wzi18    | K18      |          | IncFII   | IncX3     |            |            |           |            |            |
| 046037 | sputum               | 789       | wzi18    | K18      | IncFIB   | IncFII   | IncX3     |            |            |           |            |            |
| 046038 | tracheal tube        | 789       | wzi18    | K18      | IncFIB   | IncFII   | IncX3     |            |            |           |            |            |
| 046041 | sputum               | 789       | wzi18    | K18      | IncFIB   | IncFII   | IncX3     |            |            |           |            |            |
| 046043 | blood                | 789       | wzi18    | K18      |          | IncFII   | IncX3     |            |            |           |            |            |
| 046045 | sputum               | 789       | wzi18    | K18      |          | IncFII   | IncX3     |            |            |           |            |            |
| 046046 | sputum               | 789       | wzi18    | K18      | IncFIB   | IncFII   | IncX3     |            |            |           |            |            |
| 046047 | blood                | 789       | wzi18    | K18      | IncFIB   | IncFII   | IncX3     |            |            |           |            |            |
| 046048 | tracheal tube        | 789       | wzi18    | K18      | IncFIB   | IncFII   | IncX3     |            |            |           |            |            |
| 046049 | tracheal tube        | 789       | wzi18    | K18      | IncFIB   | IncFII   | IncX3     |            |            |           |            |            |
| strian | Col(pHAD28)          | Col(MGD2) | ColIRNAI | blaNDM-5 | blaNDM-1 | blaIMP-4 | blaSHV-25 | blaSHV-187 | blaSHV-215 | blaSHV-27 | blaSHV-101 | blaSHV-33  |
| 046001 |                      |           |          |          | blaNDM-1 |          |           |            | blaSHV-215 |           |            |            |
| 046002 |                      |           |          | blaNDM-5 |          |          |           | blaSHV-187 |            |           |            |            |
| 046003 |                      |           |          |          | blaNDM-1 |          |           |            | blaSHV-215 |           |            |            |



|               |              |              |               |             |             |              |              |             |             |             |                |               |
|---------------|--------------|--------------|---------------|-------------|-------------|--------------|--------------|-------------|-------------|-------------|----------------|---------------|
| 046011        |              |              | blaTEM-1      | blaCTX-M-15 |             |              |              |             |             |             |                |               |
| 046012        |              |              | blaTEM-1      | blaCTX-M-15 |             |              |              |             |             |             |                |               |
| 046015        |              |              | blaTEM-1      | blaCTX-M-15 |             |              |              |             |             |             |                |               |
| 046016        |              |              | blaTEM-1      | blaCTX-M-15 |             |              |              |             |             |             |                |               |
| 046017        |              |              | blaTEM-1      | blaCTX-M-15 |             |              |              |             |             |             |                |               |
| 046018        |              |              | blaTEM-1      | blaCTX-M-15 |             |              |              |             |             |             |                |               |
| 046019        |              |              |               |             |             |              |              |             |             |             |                |               |
| 046020        |              |              |               | blaCTX-M-14 | blaDHA-1    |              |              |             |             |             |                |               |
| 046021        |              |              | blaTEM-1      | blaCTX-M-15 |             |              |              |             |             |             |                |               |
| 046022        |              |              |               | blaCTX-M-14 | blaDHA-1    |              |              |             |             |             |                |               |
| 046023        |              |              |               | blaCTX-M-14 | blaDHA-1    |              |              |             |             |             |                |               |
| 046024        |              |              | blaTEM-1      | blaCTX-M-15 |             |              |              |             |             |             |                |               |
| 046025        |              |              | blaTEM-1      | blaCTX-M-15 |             |              |              |             |             |             |                |               |
| 046026        |              |              | blaTEM-1      | blaCTX-M-15 |             |              |              |             |             |             |                |               |
| 046027        |              |              | blaTEM-1      | blaCTX-M-15 |             |              |              |             |             |             |                |               |
| 046028        |              |              | blaTEM-1      | blaCTX-M-15 |             |              |              |             |             | aac(6')-Ib4 |                |               |
| 046029        |              |              | blaTEM-1      | blaCTX-M-15 |             |              |              |             |             |             |                |               |
| 046030        |              |              |               |             |             |              |              |             |             |             |                |               |
| 046031        |              |              | blaTEM-1      | blaCTX-M-15 |             |              |              |             |             |             |                |               |
| 046032        |              |              | blaTEM-1      | blaCTX-M-15 |             |              |              |             |             |             |                |               |
| 046034        |              |              | blaTEM-1      | blaCTX-M-15 |             |              |              |             |             |             |                |               |
| 046035        |              |              | blaTEM-1      | blaCTX-M-15 |             |              |              |             |             |             |                |               |
| 046036        |              |              | blaTEM-1      | blaCTX-M-15 |             |              |              |             |             |             |                |               |
| 046037        |              |              | blaTEM-1      | blaCTX-M-15 |             |              |              |             |             |             |                |               |
| 046038        |              |              | blaTEM-1      | blaCTX-M-15 |             |              |              |             |             |             |                |               |
| 046041        |              |              | blaTEM-1      | blaCTX-M-15 |             |              |              |             |             |             |                |               |
| 046043        |              |              | blaTEM-1      | blaCTX-M-15 |             |              |              |             |             |             |                |               |
| 046045        |              |              | blaTEM-1      | blaCTX-M-15 |             |              |              |             |             |             |                |               |
| 046046        |              |              | blaTEM-1      | blaCTX-M-15 |             |              |              |             |             |             |                |               |
| 046047        |              |              | blaTEM-1      | blaCTX-M-15 |             |              |              |             |             |             |                |               |
| 046048        |              |              | blaTEM-1      | blaCTX-M-15 |             |              |              |             |             |             |                |               |
| 046049        |              |              | blaTEM-1      | blaCTX-M-15 |             |              |              |             |             |             |                |               |
| <b>strian</b> | <b>catA1</b> | <b>catB3</b> | <b>mph(A)</b> | <b>oqxB</b> | <b>oqxA</b> | <b>qnrB4</b> | <b>arr-3</b> | <b>sul1</b> | <b>sul2</b> | <b>fosA</b> | <b>tet(34)</b> | <b>tet(D)</b> |
| 046001        |              | catB3        | mph(A)        | oqxB19      | oqxA6       |              | arr-3        | sul1        | sul2        | fosA6       | tet(34)        |               |
| 046002        |              |              |               | oqxB26      | oqxA9       | qnrB4        |              | sul1        |             | fosA6       | tet(34)        |               |
| 046003        |              | catB3        | mph(A)        | oqxB19      | oqxA6       |              | arr-3        | sul1        | sul2        | fosA_gen    | tet(34)        |               |
| 046004        |              |              |               | oqxB26      | oqxA9       | qnrB4        |              | sul1        |             | fosA_gen    | tet(34)        |               |
| 046005        |              |              |               |             |             |              |              | sul1        |             | fosA_gen    | tet(34)        | tet(D)        |
| 046007        |              |              |               | oqxB19      |             |              |              |             | sul2        | fosA_gen    | tet(34)        |               |
| 046008        | catA1        |              |               | oqxB26      | oqxA10      |              |              |             |             | fosA_gen    | tet(34)        | tet(D)        |
| 046009        | catA1        |              |               | oqxB26      | oqxA10      |              |              |             |             | fosA_gen    | tet(34)        | tet(D)        |
| 046010        | catA1        |              |               | oqxB26      | oqxA10      |              |              |             |             | fosA_gen    | tet(34)        | tet(D)        |
| 046011        | catA1        |              |               | oqxB26      | oqxA10      |              |              |             |             | fosA_gen    | tet(34)        | tet(D)        |
| 046012        | catA1        |              |               | oqxB26      | oqxA10      |              |              |             |             | fosA_gen    | tet(34)        | tet(D)        |
| 046015        | catA1        |              |               | oqxB26      | oqxA10      |              |              |             |             | fosA_gen    | tet(34)        | tet(D)        |
| 046016        |              |              |               | oqxB26      | oqxA10      |              |              |             |             | fosA_gen    | tet(34)        |               |
| 046017        | catA1        |              |               | oqxB26      | oqxA10      |              |              |             |             | fosA_gen    | tet(34)        | tet(D)        |
| 046018        | catA1        |              |               | oqxB26      | oqxA10      |              |              |             |             | fosA_gen    | tet(34)        | tet(D)        |

|        |       |        |        |       |      |          |         |        |
|--------|-------|--------|--------|-------|------|----------|---------|--------|
| 046019 |       | oqxB32 | oqxA6  |       |      | fosA_gen | tet(34) |        |
| 046020 |       | oqxB26 | oqxA9  | qnrB4 | sul1 | fosA_gen | tet(34) |        |
| 046021 |       | oqxB26 | oqxA10 |       |      | fosA_gen | tet(34) |        |
| 046022 |       | oqxB26 | oqxA9  | qnrB4 | sul1 | fosA_gen | tet(34) |        |
| 046023 |       | oqxB26 | oqxA9  | qnrB4 | sul1 | fosA_gen | tet(34) |        |
| 046024 | catA1 | oqxB26 | oqxA10 |       |      | fosA_gen | tet(34) | tet(D) |
| 046025 | catA1 | oqxB26 | oqxA10 |       |      | fosA_gen | tet(34) | tet(D) |
| 046026 | catA1 | oqxB26 | oqxA10 |       |      | fosA_gen | tet(34) | tet(D) |
| 046027 | catA1 | oqxB26 | oqxA10 |       |      | fosA_gen | tet(34) | tet(D) |
| 046028 |       | oqxB25 | oqxA10 |       | sul1 | fosA6    | tet(34) |        |
| 046029 | catA1 | oqxB26 | oqxA10 |       |      | fosA_gen | tet(34) | tet(D) |
| 046030 |       | oqxB12 | oqxA4  |       |      | fosA6    | tet(34) |        |
| 046031 | catA1 | oqxB26 | oqxA10 |       |      | fosA_gen | tet(34) | tet(D) |
| 046032 |       | oqxB26 |        |       |      | fosA_gen | tet(34) |        |
| 046034 | catA1 | oqxB26 | oqxA10 |       |      | fosA_gen | tet(34) | tet(D) |
| 046035 | catA1 | oqxB26 | oqxA10 |       |      | fosA_gen | tet(34) | tet(D) |
| 046036 |       | oqxB26 | oqxA10 |       |      | fosA_gen | tet(34) |        |
| 046037 | catA1 | oqxB26 | oqxA10 |       |      | fosA_gen | tet(34) | tet(D) |
| 046038 | catA1 | oqxB26 | oqxA10 |       |      | fosA5    | tet(34) | tet(D) |
| 046041 | catA1 | oqxB26 | oqxA10 |       |      | fosA_gen | tet(34) | tet(D) |
| 046043 |       | oqxB26 | oqxA10 |       |      | fosA_gen | tet(34) |        |
| 046045 |       | oqxB26 | oqxA10 |       |      | fosA_gen | tet(34) |        |
| 046046 | catA1 | oqxB26 | oqxA10 |       |      | fosA_gen | tet(34) | tet(D) |
| 046047 | catA1 | oqxB26 | oqxA10 |       |      | fosA_gen | tet(34) | tet(D) |
| 046048 |       | oqxB26 | oqxA10 |       |      | fosA_gen | tet(34) |        |
| 046049 | catA1 | oqxB26 | oqxA10 |       |      | fosA_gen | tet(34) | tet(D) |
